# Supplementary material for: Milk consumers in Pakistan and Italy: a comparative study on the effects of geographical affiliation, socio-demographic characteristics and consumption patterns on knowledge, attitude and perception of antimicrobial resistance
Source: PubMed Central journal article supplement (PMC11657578; doi:10.1186/s12889-024-21002-w), 2024-12-18
Supplement: 12889_2024_21002_MOESM2_ESM.pdf [file 12889_2024_21002_MOESM2_ESM.pdf]

Dear Sir or Madam,

the questionnaire that is proposed to you is part of a survey developed by the Department of Agricultural, Forest and Food Sciences of the University of Turin (Italy). The objective of this research is to explore the milk consumer's awareness regarding the use of antimicrobials in dairy farms. In addition, the survey investigates the habits of choice and consumption, as well as the preferences, of milk consumers. To this end, the questionnaire is organized into 2 main sections:

- the first section is focused on the socio-demographic characteristics of the respondent and its cow/buffalo milk purchasing and consumption habits.
- the second section relates to the level of knowledge of the use of antimicrobials for the management of dairy cattle/buffaloes.

The collected data are totally anonymous and will not be used for profit purposes. The collected data will be computerized and processed through the support of statistical packages by the Researchers involved in this study: Prof. Manuela Renna (Associate Professor of Animal Nutrition; scientific manager of the project), Dr. Valentina Maria Merlino (Research fellow) and Dr. Talal Hassan (Student of the Master' Degree Course of Animal Science).

The completion of the questionnaire will take you 3-4 minutes at most.

Feel free to answer the questionnaire or refuse to fill it out at any time you wish.

In the next section you will have to choose whether or not to consent to fill out the questionnaire.

If you click "I consent," you can proceed with the completion. Otherwise, you can decide to abandon the completion by choosing the "I do not consent" option.

- I consent

- I do not consent

Thank you.

**a. General information**

1. Where do you live? (indicate the region)

- a) Faisalabad
- b) Jhang
- c) Multan
- d) Okara

2. You are

- a) Man
- b) Woman
- c) I prefer not to answer

3. Age: \_\_\_\_\_

4. Family size:

- a) 1                      b) 2                      c) 3                      d) 4                      e) more than 4

5. Age of Children

1. Son/Daughter \_\_\_\_\_                      2. Son/Daughter \_\_\_\_\_                      3. Son/Daughter \_\_\_\_\_

6. Employment status

|                                 |                                |                                     |                               |                                         |                                             |
|---------------------------------|--------------------------------|-------------------------------------|-------------------------------|-----------------------------------------|---------------------------------------------|
| <input type="radio"/> Student   | <input type="radio"/> Employee | <input type="radio"/> Self-employed | <input type="radio"/> Retired | <input type="radio"/> Looking for a job | <input type="radio"/> Housewife or houseman |
| Other then please specify _____ |                                |                                     |                               |                                         |                                             |

7. Education Level/Qualification:

|                                      |                                              |                                              |                                     |
|--------------------------------------|----------------------------------------------|----------------------------------------------|-------------------------------------|
| <input type="radio"/> Primary School | <input type="radio"/> Lower Secondary School | <input type="radio"/> Upper Secondary School | <input type="radio"/> Master Degree |
|--------------------------------------|----------------------------------------------|----------------------------------------------|-------------------------------------|

8. Indicate the monthly average family income:

|                                            |                                            |                                             |                                              |
|--------------------------------------------|--------------------------------------------|---------------------------------------------|----------------------------------------------|
| <input type="radio"/> Less than 50.000 PKR | <input type="radio"/> More than 50.000 PKR | <input type="radio"/> More than 100.000 PKR | <input type="radio"/> I prefer not to answer |
|--------------------------------------------|--------------------------------------------|---------------------------------------------|----------------------------------------------|

9. How can you define your income?

|                                 |                                      |                                  |                                       |
|---------------------------------|--------------------------------------|----------------------------------|---------------------------------------|
| <input type="radio"/> Difficult | <input type="radio"/> Very difficult | <input type="radio"/> Satisfying | <input type="radio"/> Very Satisfying |
|---------------------------------|--------------------------------------|----------------------------------|---------------------------------------|

**b. Milk purchasing and consumption habits**

10. Do you consume milk?

- a) YES                      b) NO

11. What type of milk do you consume?

|                                            |                                                 |                                    |
|--------------------------------------------|-------------------------------------------------|------------------------------------|
| <input type="radio"/> Cow milk             | <input type="radio"/> Milk from small ruminants | <input type="radio"/> Buffalo Milk |
| <input type="radio"/> Other? Specify _____ |                                                 |                                    |

12. What is your food style?

|                                            |                             |                                   |
|--------------------------------------------|-----------------------------|-----------------------------------|
| <input type="radio"/> Vegetarian           | <input type="radio"/> Vegan | <input type="radio"/> Traditional |
| <input type="radio"/> Other. Specify _____ |                             |                                   |

13. Where do you buy cow/buffalo milk from? (More than one answer is possible)

|                                               |                                            |                                        |
|-----------------------------------------------|--------------------------------------------|----------------------------------------|
| <input type="radio"/> Home delivery (Gawala)/ | <input type="radio"/> Milk shop            | <input type="radio"/> Farm (Producer)/ |
| <input type="radio"/> Supermarket             | <input type="radio"/> Other? Specify _____ |                                        |

14. How many times do you buy milk?

|                                             |                                        |                                                |                                                |                             |
|---------------------------------------------|----------------------------------------|------------------------------------------------|------------------------------------------------|-----------------------------|
| <input type="radio"/> Less than once a week | <input type="radio"/> 1-2 times a week | <input type="radio"/> From 3 to 5 times a week | <input type="radio"/> More than 5 times a week | <input type="radio"/> Daily |
|---------------------------------------------|----------------------------------------|------------------------------------------------|------------------------------------------------|-----------------------------|

15. Considering a scale from 0 (not at all important) to 6 (very important), indicate the level of importance that you consider for each of the following factors during the milk choice in the purchasing-process:

| Factors                 | 0 | 1 | 2 | 3 | 4 | 5 | 6 |
|-------------------------|---|---|---|---|---|---|---|
| Producer reliability    |   |   |   |   |   |   |   |
| Knowledge of the farmer |   |   |   |   |   |   |   |
| Health benefits         |   |   |   |   |   |   |   |
| Have no alternative     |   |   |   |   |   |   |   |
| Price                   |   |   |   |   |   |   |   |
| Family tradition        |   |   |   |   |   |   |   |
| Approval of family head |   |   |   |   |   |   |   |
| Taste                   |   |   |   |   |   |   |   |
| Safety                  |   |   |   |   |   |   |   |

**c. Antibiotics residues in milk**

16. Are you aware of the possibility of antibiotic (AB) residues in milk according to the maximum residual limits set by the laws?

- a) Yes                      b) No

17) Do you know that antibiotic/their residues in milk above maximum residual limits may lead to antimicrobial resistance?

- a) Yes                      b) No

18. What do you think about the presence of antibiotic residues in milk:

- a. I think it is dangerous for my health
- b. I think it is more dangerous for children.
- c. I think it is not dangerous for my health
- d. I don't know

19. Would you buy milk with AB residues above regulated MRLs (maximum residue levels)?

- a) Yes                      b) No                      c) I do not know

20. Do you know the AMR phenomenon?

- a) Yes                      b) No

If not, we explain it to you. **Antimicrobial resistance** refers to the ability of microorganisms to withstand antimicrobial treatments. The overuse or misuse of antibiotics has been linked to the emergence and spread

of microorganisms which are resistant to them, rendering treatment ineffective and posing a serious risk to public health.

Thank you!

**The questionnaire is finished.**

**Thank you for giving a few minutes of your time to this research.**

**Best regards.**
